# Supplementary material for: Immunomodulatory Role of an Ayurvedic Formulation on Imbalanced Immunometabolics during Inflammatory Responses of Obesity and Prediabetic Disease
Source: Hindawi journal article supplement (doi:10.1155/2013/795072), 2013-01-01
Supplement: f1 [file 795072.f1.pdf]

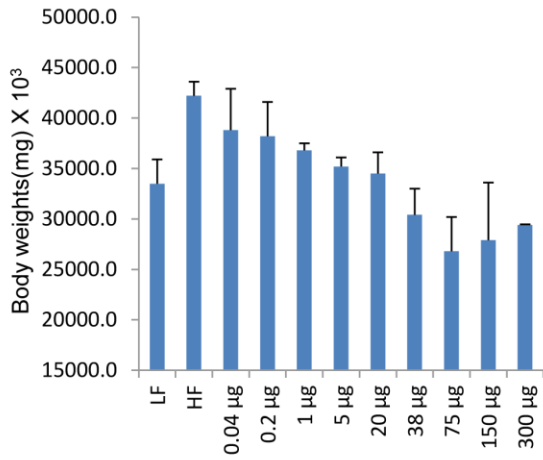

**Figure S1**

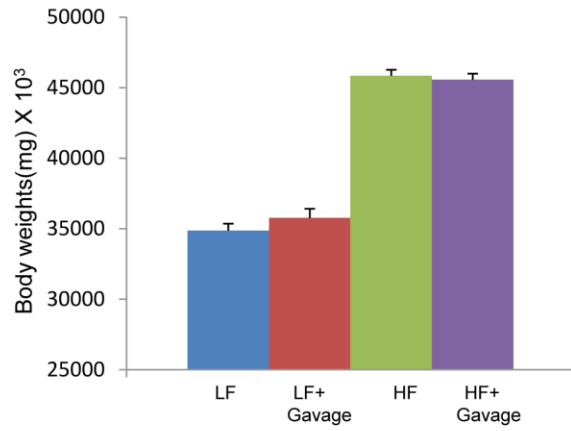

**Figure S2**

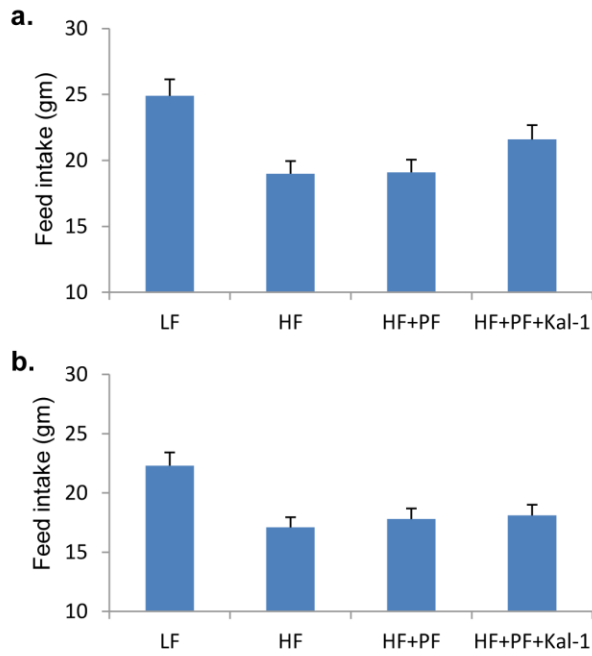

**Figure S3**

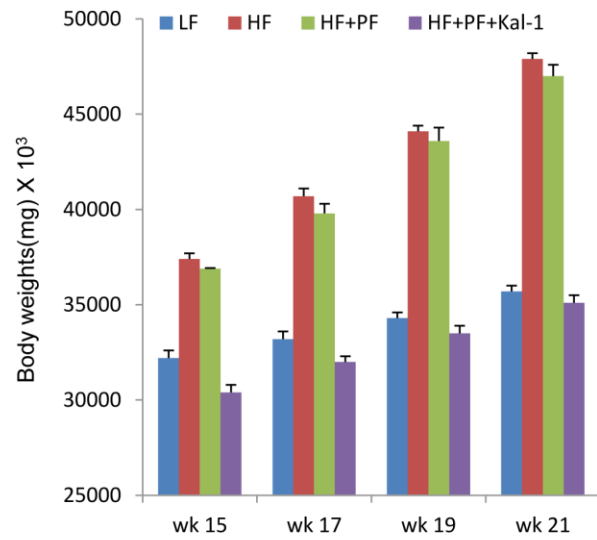

**Figure S4**

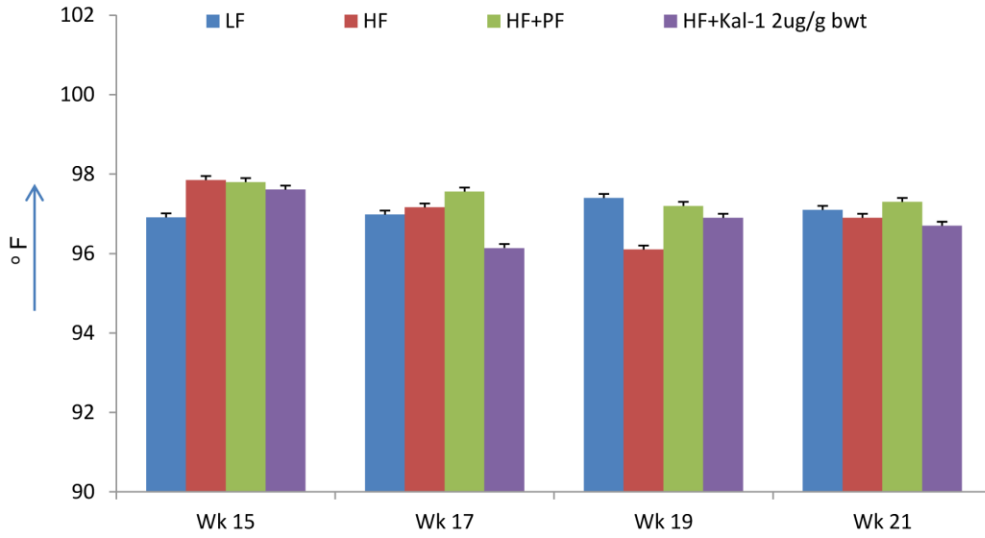

**Figure S5**

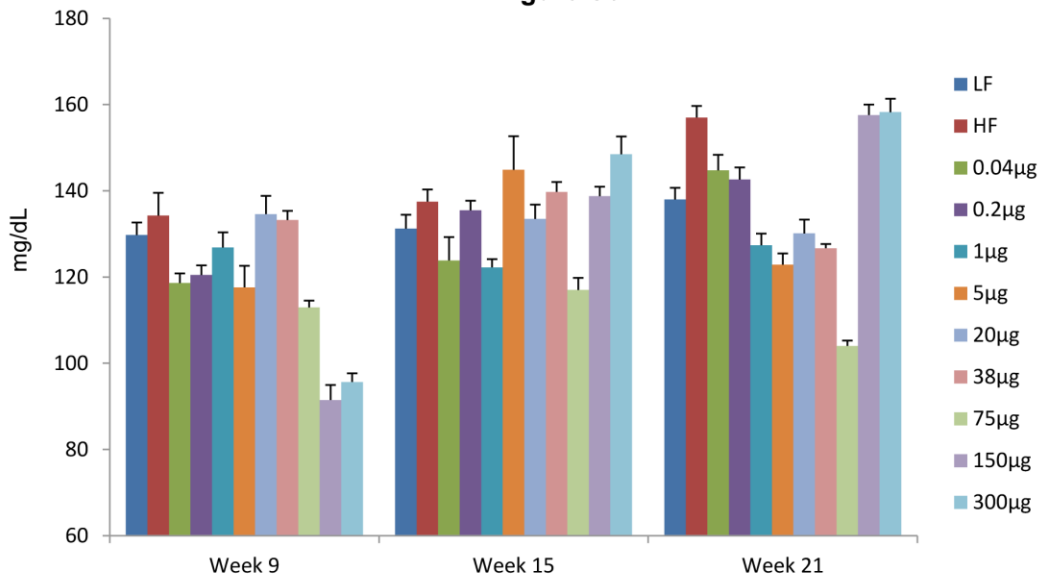

**Figure S6**

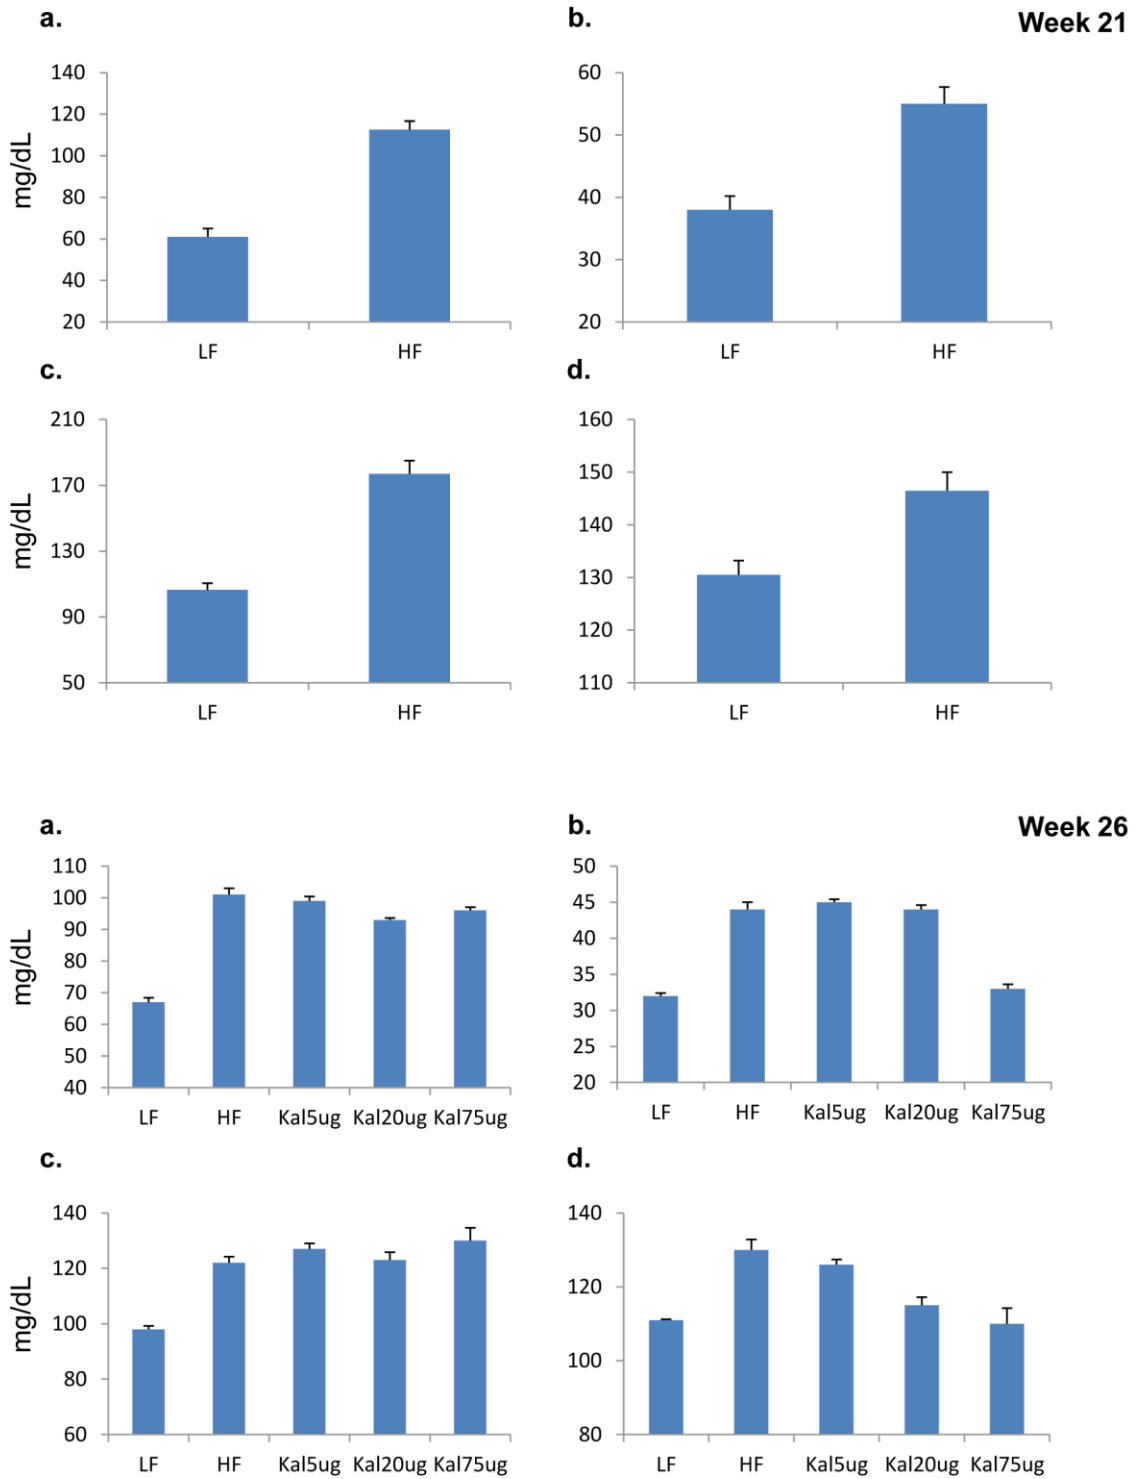

**Figure S7**

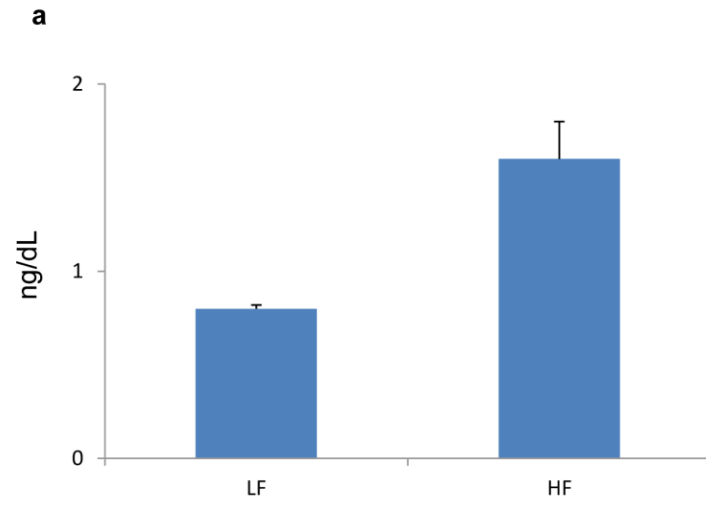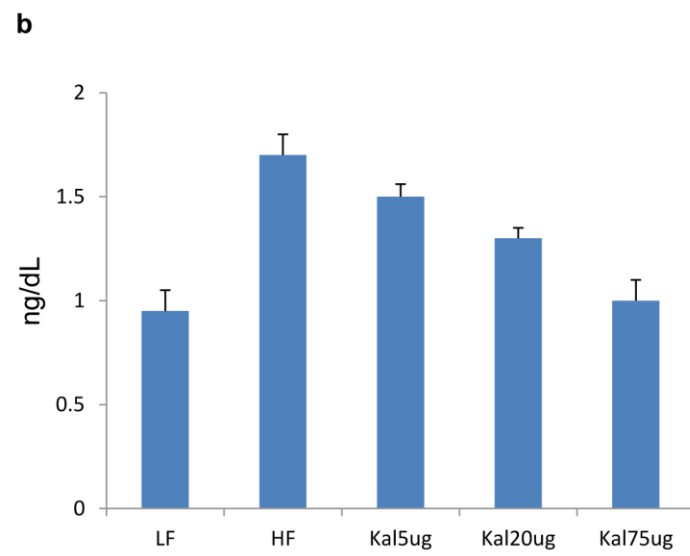

**Figure S8**

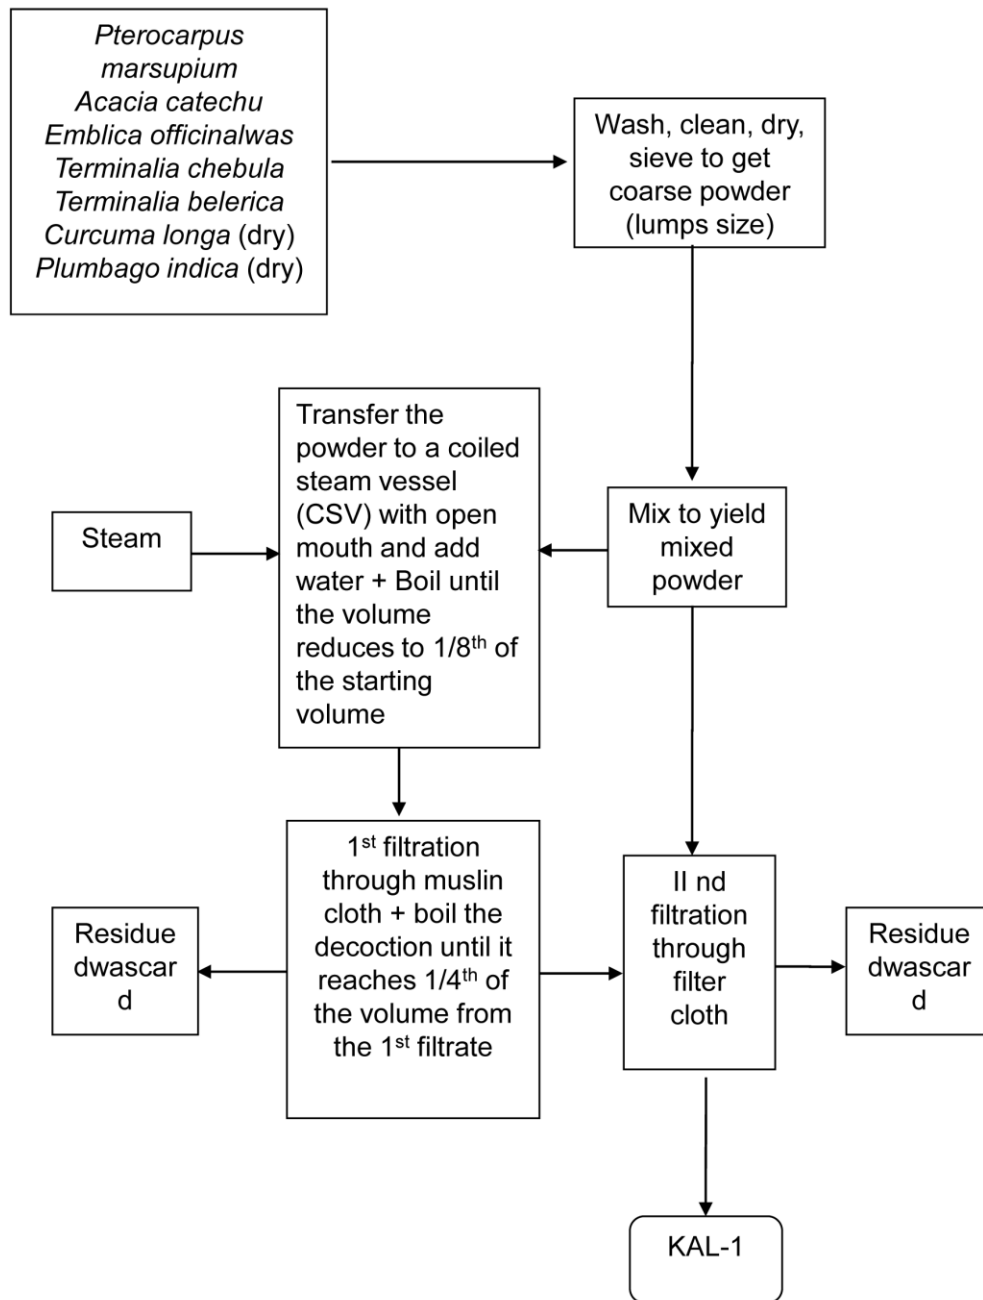

**Figure S9**
